# Supplementary material for: Mental Health Service Use Among Immigrants in the United States: A Systematic Review
Source: Atypon-hosted journal article supplement (doi:10.1176/appi.ps.201500004), 2015-12-15
Supplement: appi.ps.201500004.ds001.pdf [file appi.ps.201500004.ds001.pdf]

**Supplemental Figure 1. Literature Review Process**

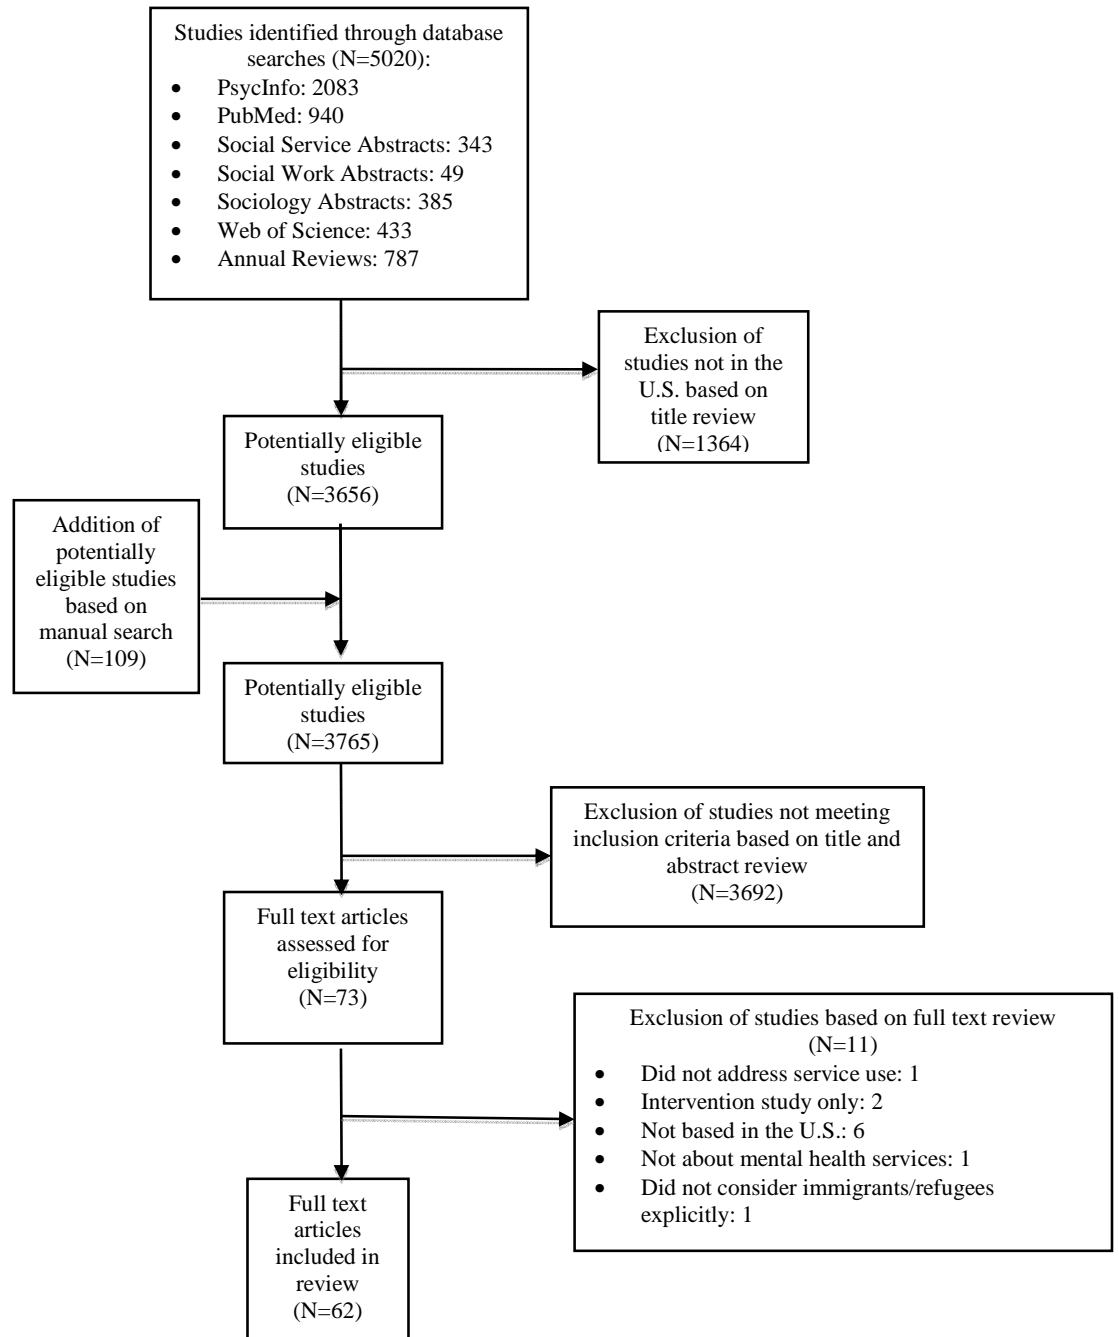

## IMMIGRANT MENTAL HEALTH SERVICE USE

**Supplemental Table 1. Service Provider Types**

| <b>Provider Type</b>                      | <b>Percentage of Measures Including Provider</b> |
|-------------------------------------------|--------------------------------------------------|
| Formal Providers                          |                                                  |
| Mental Health Specialists <sup>a</sup>    | 33%                                              |
| Western Medical Services <sup>b</sup>     | 26%                                              |
| School Services <sup>c</sup>              | 1%                                               |
| Informal Providers                        |                                                  |
| Religious <sup>d</sup>                    | 12%                                              |
| Alternative Medical Services <sup>e</sup> | 9%                                               |
| Social Network <sup>f</sup>               | 9%                                               |
| Alternative Practices <sup>g</sup>        | 8%                                               |

<sup>a</sup> psychologist, general mental health professional, psychiatrist, social worker, counselor, mental health hotline, psychiatric nurse, general outpatient services, clinician at drug/alcohol clinic, therapist, group counseling, individual counseling, in-home counseling, crisis counseling, day treatment

<sup>b</sup> general/primary care doctor, nurse, other medical specialist, family practitioner, physical or occupational therapist, emergency room, general inpatient services, internist, cardiologist, gynecologist, medication, physician assistant

<sup>c</sup> school counselor, teacher, coach, school nurse, other school personnel

<sup>d</sup> religious leader/spiritual advisor, priest, minister, rabbi, monk, sheikh, Santeria, god, Koran, prayer, faith, pastor, staff at faith-based organizations, meditation

<sup>e</sup> traditional/natural/folk healer (e.g., Kruu Khmer, Curandero), herbalist, chiropractor, homeopath, doctor of oriental medicine, acupuncturist, naturalist, naturopath

<sup>f</sup> family, friends, self-help, online or in person support groups, community members, an elder, chat room

<sup>g</sup> spiritualists, fortune teller/psychic, massage, astrologer, megavitamins, yoga, hypnosis, reiki, folk remedy, chelation, qi gong, macrobiotics, polarity, aromatherapy, tai chi, biofeedback, guided imagery, Ayurveda, dietary practices

## IMMIGRANT MENTAL HEALTH SERVICE USE

Supplemental Table 2. Descriptive Summary of Reviewed Articles n=62

| Characteristic                 | n  | %   | Citation                                                             |
|--------------------------------|----|-----|----------------------------------------------------------------------|
| <b>Methodology</b>             |    |     |                                                                      |
| Quantitative                   | 53 | 86  | 31-48,50-55,57,59-63,65,66,68,70,72-76,78,80-92                      |
| Qualitative                    | 6  | 10  | 58,67,69,71,77,79                                                    |
| Mixed-Method                   | 3  | 5   | 49,56,64                                                             |
| Cross-sectional                | 62 | 100 | 31-92 (All)                                                          |
| <b>Analysis</b>                |    |     |                                                                      |
| Multivariate                   | 45 | 73  | 31-45,48,50-55,57,59,62,63,65,66,68,72-76,78,80-87,89,90             |
| Bivariate and group comparison | 12 | 19  | 34,46,47,49,56,60,61,64,70,88,91,92                                  |
| Descriptive qualitative        | 8  | 13  | 49,56,58,67,69,71,77,79                                              |
| <b>Data Collection Tool</b>    |    |     |                                                                      |
| Quantitative Survey            | 52 | 84  | 31,33-46,48-52,54-57,59-63,65-68,70,72-76,78,80-91                   |
| Medical Chart Review           | 5  | 8   | 32,47,53,63,92                                                       |
| Qualitative Interview          | 5  | 8   | 49,58,64,67,69                                                       |
| Focus group                    | 5  | 8   | 49,58,71,77,79                                                       |
| Card Sort                      | 1  | 2   | 64                                                                   |
| Qualitative Survey             | 1  | 2   | 56                                                                   |
| <b>Sample size</b>             |    |     |                                                                      |
| Less than 25                   | 3  | 5   | 58,69,79                                                             |
| 25-99                          | 11 | 18  | 55-57,60,64,67,71,75,77,91,92                                        |
| 100-249                        | 13 | 21  | 41,46,47,49,53,54,63,76,78,80,83,86,87                               |
| 250-499                        | 7  | 11  | 36,38,50,51,61,62,70                                                 |
| 500-999                        | 6  | 10  | 43,59,65,66,73,84                                                    |
| 1000-2499                      | 13 | 21  | 31,37,39,40,44,45,48,72,74,81,82,89,90                               |
| 2500-9999                      | 5  | 8   | 32,34,35,68,88                                                       |
| Over 10,000                    | 4  | 7   | 33,42,52,85                                                          |
| <b>Gender</b>                  |    |     |                                                                      |
| Women only                     | 5  | 8   | 45,64,72,77,83                                                       |
| Men only                       | 1  | 2   | 56                                                                   |
| <b>Immigration Status</b>      |    |     |                                                                      |
| Immigrants and U.S.-born       | 32 | 52  | 31-37,39-47,52,62,63,66,68,72-74,76,82,85,87-91                      |
| Refugees or asylum seekers     | 8  | 13  | 36,49-53,70,71                                                       |
| Undocumented immigrants        | 2  | 3   | 36,47                                                                |
| <b>Age</b>                     |    |     |                                                                      |
| Adults 18+                     | 42 | 68  | 31,33,34,36,38,40,41,45,47-49,51,52,54-65,67,68,70-75,77,81-83,87-92 |
| Adults excluding elders        | 15 | 24  | 32,33,35,37-39,43,44,50,53,66,78-80,85,86                            |
| Elders explicitly included     | 6  | 10  | 4,52,69,73,76,84                                                     |
| Youth included                 | 5  | 8   | 46,49,52,62,78                                                       |
| <b>Racial/Ethnic Groups</b>    |    |     |                                                                      |
| Asian or Pacific Islander      | 49 | 79  |                                                                      |
| General Asian                  | 13 |     | 31,35,36,38,42,48,53,68,74,82,84,85,89                               |
| Chinese                        | 10 |     | 31,37,39,59,63,67,80,86,90,92                                        |
| Korean                         | 7  |     | 54,73,77,80,86,90                                                    |
| Vietnamese                     | 5  |     | 31,41,65,71,90                                                       |

## IMMIGRANT MENTAL HEALTH SERVICE USE

|                                          |    |    |                                                                             |
|------------------------------------------|----|----|-----------------------------------------------------------------------------|
| Cambodian                                | 4  |    | 50,51,70,71                                                                 |
| Filipino                                 | 4  |    | 31,44,87,90                                                                 |
| Japanese                                 | 3  |    | 80,86,90                                                                    |
| Indian                                   | 2  |    | 55,90                                                                       |
| Laotian                                  | 1  |    | 90                                                                          |
| Latin American                           | 39 | 61 |                                                                             |
| General Latino                           | 22 |    | 32,33,35,38,40,45–<br>47,53,56,57,64,68,72,74,76,78,79,81,83–85             |
| Mexican                                  | 6  |    | 43,58,66,75,81,88                                                           |
| Unspecified Central or<br>South American | 3  |    | 40,60,88                                                                    |
| Puerto Rican                             | 2  |    | 81,88                                                                       |
| Cuban                                    | 2  |    | 81,88                                                                       |
| Honduran                                 | 1  |    | 75                                                                          |
| El Salvadoran                            | 1  |    | 75                                                                          |
| Peruvian                                 | 1  |    | 58                                                                          |
| Hispanic                                 | 1  |    | 62                                                                          |
| African and Caribbean                    | 12 | 19 |                                                                             |
| General African                          | 7  |    | 33,45,53,71,72,85,91                                                        |
| Caribbean                                | 2  |    | 34,53                                                                       |
| Nigerian                                 | 1  |    | 61                                                                          |
| Ethiopian                                | 1  |    | 61                                                                          |
| Somali                                   | 1  |    | 49                                                                          |
| European                                 | 6  | 10 |                                                                             |
| General European                         | 4  |    | 33,42,53,85                                                                 |
| Russian                                  | 1  |    | 52                                                                          |
| General Eastern European                 | 1  |    | 71                                                                          |
| Middle Eastern                           | 4  | 7  |                                                                             |
| Iranian                                  | 2  |    | 69,71                                                                       |
| Iraqi                                    | 1  |    | 71                                                                          |
| General Middle Eastern                   | 1  |    | 53                                                                          |
| Research questions                       |    |    |                                                                             |
| Factors related to service use           | 38 | 61 | 31–33,35–37,39–41,43–45,48–51,56,57,62,65–68,72,74–<br>76,78–84,86,88,89,92 |
| Rate of service use                      | 32 | 52 | 31–36,39,40,42,43,45–53,58–63,66,68,81,82,88,89,91                          |
| Barriers to service use                  | 23 | 37 | 38,41,43,45,56,57,60,64,69–75,77,78,80,82,85–87,89                          |
| Provider type                            | 13 | 21 | 36,43–45,51,54,55,62,64,66,89,90,92                                         |
| Service provider measures                |    |    |                                                                             |
| Formal providers only                    | 26 | 42 | 32,33,35,38,42,46–48,50,61,68,70,73–75,80,82–88,90–92                       |
| Informal providers only                  | 1  | 2  | 63                                                                          |
| Both formal and informal                 | 27 | 44 | 31,34,36,37,40,41,43–45,49,51–57,59,60,62,64–<br>67,76,81,89                |
| Unspecified provider or N/A              | 8  | 13 | 37,58,69,71,72,77–79                                                        |
| Service use measures                     |    |    |                                                                             |
| Past year                                | 25 | 40 | 31,32,34,35,37,38,42–44,46,48,50,51,60–<br>62,66,68,74,76,81,84,85,89,90    |
| Lifetime                                 | 14 | 23 | 36,39–41,47,49,52,53,56,57,74,81,82,88                                      |
| General mental health service use        | 10 | 16 | 54,55,58,59,65,67,69,77,79,91                                               |

## IMMIGRANT MENTAL HEALTH SERVICE USE

|                                   |    |    |                                                                       |
|-----------------------------------|----|----|-----------------------------------------------------------------------|
| Attitudes about use               | 9  | 15 | 41,45,56,57,73,75,80,86,87                                            |
| Barriers to use                   | 8  | 13 | 56,57,60,64,70,74,75,77                                               |
| Stigma and norms                  | 6  | 10 | 45,56,57,63,69,72                                                     |
| Treatment adherence/office visits | 4  | 7  | 33,47,83,92                                                           |
| Provider preference               | 3  | 5  | 41,56,57                                                              |
| Knowledge of resources            | 1  | 2  | 78                                                                    |
| Measures of need for services     |    |    |                                                                       |
| Symptom checklist                 | 24 | 39 | 33,37,42,44–46,49–51,54–59,64,65,68,73,75,80,83,86                    |
| Diagnosis                         | 23 | 37 | 31,34–<br>36,38,39,43,47,48,50,52,53,60,62,63,66,70,74,81,82,84,88,90 |
| Self-reported need                | 14 | 23 | 33,37,38,40,45,48,61,68,72,76,82,84,85,89                             |
| N/A or Unknown                    | 9  | 15 | 32,41,69,71,77–79,87,91                                               |
| Suicide attempt                   | 2  | 3  | 67,83                                                                 |
| Referral from doctor              | 1  | 2  | 92                                                                    |
| Immigration related measures      |    |    |                                                                       |
| English fluency                   | 22 | 36 | 31,35,36,38,40,42,48,50,51,61,70,73,74,76,80–82,84–86,89,90           |
| Birthplace/country of origin      | 22 | 36 | 31–34,36,42,43,45–<br>47,53,58,61,62,66,71,72,74,75,85,88,90          |
| Years in the U.S.                 | 20 | 32 | 31,34,35,38–41,45,58,62,72,75,80,83–86,88,90,91                       |
| Immigration status                | 20 | 32 | 33,45,47,49–51,54–57,59,64,65,67,69,71,77,78,89,92                    |
| Generational Status               | 9  | 15 | 31,34,35,39,44,68,87,89,90                                            |
| Age at immigration                | 9  | 15 | 31,34–36,48,53,82,88,90                                               |
| Acculturation                     | 8  | 13 | 39,56,57,60,63,73,75,80                                               |
| Language spoken                   | 7  | 11 | 32,47,52,68,78,86,88                                                  |
| Acculturative stress              | 6  | 10 | 54,55,59,61,65,81                                                     |
| Year of immigration               | 3  | 5  | 50,70,80                                                              |
| Native language fluency           | 2  | 3  | 40,80                                                                 |
| Language barriers                 | 1  | 2  | 37                                                                    |
| Conceptual frameworks             |    |    |                                                                       |
| Health Care Utilization Model     | 11 |    | 33,35,37,66,73,76,78,82–84,88                                         |
| Illness Cognition Model           | 2  |    | 57,58                                                                 |
| Ecological Model                  | 2  |    | 78,79                                                                 |
| Network Episode Model             | 1  |    | 37                                                                    |
| Cramer's Model                    | 1  |    | 86                                                                    |
| Theory of Reasoned Action         | 1  |    | 57                                                                    |
| Stress-Coping Framework           | 1  |    | 34                                                                    |
| Gateway Provider Model            | 1  |    | 49                                                                    |
| Family Microsystems Beliefs       | 1  |    | 78                                                                    |
| Social Constructivism             | 1  |    | 55                                                                    |
| Kleinman's Framework              | 1  |    | 58                                                                    |
| Life Course Model                 | 1  |    | 48                                                                    |
